# Supplementary material
Source: Frontiers journal article supplement (https://www.frontiersin.org/articles/551246)
Supplement: Table_1.xlsx [file Table_1.xlsx]

## Sheet: Liq
The calculated parameters for each individual cantilevers in Liquid at different frequency ranges, with and without noise subtraction
CantName	FileName	Freq_upperbound	Freq_lowerbound	A1_SHO	A1_Pirzer	Awhite_SHO	Awhite_Pirzer	Res_Freq_SHO	Res_Freq_Pirzer	Q_SHO	Q_Pirzer	Chi2_SHO	Chi2_Pirzer
AC40	tip01	33837.1	7895.33	0.465006	0.429977	0.027678	0.224229	28504.1	25600.5	1.80023	1.81044	0.13	0.18
AC40	tip02	48958.6	11957.6	3.09297	3.29551	0.765599	0.089905	26553.1	23774.1	1.88901	1.51193	0.2	0.19
AC40	tip03	52004.4	12972.9	1.27022	1.35225	0.269137	0.034732	28063.7	24884.3	1.80592	1.4804	2.04	3.02
AC40	tip04	48958.6	11957.6	1.68238	1.78646	0.353986	0.0475	27335	24230.6	1.81672	1.4711	1.45	2.69
AC40	tip05	49973.8	12972.9	0.47216	0.499354	0.085732	0.012631	28129.5	25044.7	1.83951	1.53242	1.91	3.39
AC40	tip06	65992.5	16977.6	0.280627	0.293156	0.050677	0.00609	34769.1	31909.8	2.13338	1.82208	2.68	3
AC40	tip07	78006.6	20023.4	0.088771	0.094201	0.025107	0.00262	41741.3	38194.1	2.09916	1.64985	38.59	38.08
AC40	tip08	67007.8	16977.6	0.280332	0.293137	0.053471	0.006304	35779.8	32781.8	2.11852	1.78665	1.41	1.75
AC40	tip09	64018.4	16018.7	0.362876	0.377849	0.057095	0.007493	34293.9	31421.6	2.12581	1.82293	16.36	20.2
AC40	tip10	72986.6	17992.8	0.220264	0.229812	0.044977	0.005033	38833.3	35840	2.21956	1.85277	3.75	3.49
AC40	tip11	63003.1	16018.7	0.144845	0.152184	0.031086	0.003472	33668.8	30818.6	2.10469	1.75323	15.9	15.45
AC40	tip12	64977.3	16018.7	0.369118	0.385203	0.066161	0.007981	34277	31425.1	2.12947	1.80608	5.79	8.24
AC40	tip13	57024.3	13988.2	0.410749	0.429514	0.075459	0.009539	30919.3	28191.3	2.0708	1.73635	6.72	9.72
AC40	tip14	38016.2	9024.62	0.143626	0.155791	0.035568	0.004742	21551	18436.6	1.59615	1.2361	5.87	6.48
AC40	tip15	45010.3	10998.8	0.323084	0.343135	0.061833	0.008735	24869	21939.6	1.77725	1.45655	2.73	4.29
AC40	tip16	47012.6	12014	0.4634	0.492839	0.085548	0.012991	25640.7	22618.5	1.76386	1.46977	1.64	2.95
AC40	tip17	45997.4	12014	0.75102	0.79964	0.178694	0.024902	25988.4	23200.5	1.86097	1.50212	1.72	2.88
AC40	tip18	45997.4	10998.8	0.656907	0.696582	0.134221	0.019292	25542.2	22644.2	1.82127	1.47714	1.98	2.87
AC40	tip19	41005.6	9983.49	0.366795	0.396446	0.095553	0.010508	22874.7	19919.4	1.68768	1.31908	3.46	4.22
AC40	tip20	42979.8	10998.8	0.390645	0.419163	0.075551	0.010851	23918.2	20766.2	1.65865	1.36435	3.04	4.96
AC40	tip21	32996.3	8009.35	0.529278	0.598168	0.180856	0.023544	19738.1	16063.6	1.38793	0.988105	1.44	1.99
AC40	tip22	49007.8	11995.3	0.166142	0.177514	0.051772	0.016507	26313.9	23842.9	1.99982	1.54108	21.28	19.76
AC40	tip23	45998.9	11995.3	1.50273	1.60565	0.319554	0.044112	26114.8	22955.2	1.74089	1.41792	3.42	5.15
AC40	tip24	48001.4	11995.3	0.470223	0.498394	0.080812	0.012497	27162.8	23949.1	1.77483	1.46851	4.08	6.54
AC40	tip25	46998.8	11996.3	0.438226	0.466984	0.0916	0.012515	26736.6	23557.2	1.76438	1.43344	10.73	15.28
No 1 over f	*	*	*	*	*	*	*	*	*	*	*	*	*
AC40	tip01	33837.1	7895.33	0.446562	0.412807	0.162756	0.268137	28185.3	25541.1	1.87236	1.95962	0.2	0.31
AC40	tip02	48958.6	11957.6	3.09727	3.30684	0.789887	0.092408	26558.9	23733.2	1.87166	1.48861	0.19	0.2
AC40	tip03	52004.4	12972.9	1.27882	1.37403	0.315064	0.039322	28095.9	24681.8	1.73597	1.38543	1.78	3.4
AC40	tip04	48958.6	11957.6	1.69167	1.81146	0.407655	0.052965	27369.1	24035.8	1.74804	1.38098	1.48	3.59
AC40	tip05	49973.8	12972.9	0.474232	0.504687	0.099201	0.013866	28150.1	24911.4	1.79064	1.46431	1.77	3.8
AC40	tip06	65992.5	16977.6	0.281861	0.296326	0.060482	0.007002	34781.5	31767.7	2.0718	1.72728	2.45	3.3
AC40	tip07	78006.6	20023.4	0.089419	0.095477	0.028444	0.010773	41769.3	37879.2	1.99852	1.54883	38.84	40.02
AC40	tip08	67007.8	16977.6	0.281537	0.296353	0.063007	0.00722	35795.5	32621	2.05317	1.68923	1.25	2.04
AC40	tip09	64018.4	16018.7	0.364605	0.382576	0.073479	0.008937	34309.2	31244.8	2.05116	1.70865	14.75	25.78
AC40	tip10	72986.6	17992.8	0.221281	0.232698	0.053645	0.00587	38851.2	35634.9	2.13475	1.72723	3.34	4.22
AC40	tip11	63003.1	16018.7	0.145756	0.154546	0.037213	0.004089	33687.6	30612.6	2.01779	1.62577	15.08	15.99
AC40	tip12	64977.3	16018.7	0.370133	0.387965	0.075284	0.008817	34287	31321.6	2.08447	1.73765	5.4	9.35
AC40	tip13	57024.3	13988.2	0.412006	0.433069	0.086542	0.01057	30933	28074.5	2.01921	1.66088	6.04	11.08
AC40	tip14	38016.2	9024.62	0.145487	0.160626	0.041675	0.005558	21668.1	18056.7	1.47446	1.09765	6.6	7.86
AC40	tip15	45010.3	10998.8	0.324758	0.347534	0.071791	0.009728	24898	21782.2	1.71845	1.37776	2.6	4.7
AC40	tip16	47012.6	12014	0.465797	0.498804	0.099596	0.014241	25661.3	22484.1	1.71517	1.40134	1.54	3.17
AC40	tip17	45997.4	12014	0.753618	0.806332	0.192544	0.026239	26001	23102.6	1.8217	1.44959	1.59	3.13
AC40	tip18	45997.4	10998.8	0.659278	0.703101	0.149276	0.020731	25562.6	22520.9	1.77408	1.41432	1.9	3.1
AC40	tip19	41005.6	9983.49	0.369896	0.404369	0.107512	0.012116	22930	19686.8	1.60449	1.21917	2.92	4.61
AC40	tip20	42979.8	10998.8	0.39378	0.426847	0.090638	0.012397	23961.2	20568.5	1.59207	1.27555	2.94	5.8
AC40	tip21	32996.3	8009.35	0.535818	0.614156	0.191887	0.025605	19856	15746.2	1.30716	0.908093	1.41	2.64
AC40	tip22	49007.8	11995.3	0.16641	0.178062	0.053118	0.018929	26318.5	23794.6	1.97721	1.51882	20.7	20.03
AC40	tip23	45998.9	11995.3	1.50908	1.62149	0.351345	0.047465	26137.2	22837.6	1.69983	1.36372	3.27	5.42
AC40	tip24	48001.4	11995.3	0.472856	0.505277	0.097829	0.014082	27193.1	23770	1.71392	1.38539	3.62	7.07
AC40	tip25	46998.8	11996.3	0.440285	0.472273	0.102515	0.013653	26763.4	23412.1	1.71427	1.36769	10.28	16.21
Freq bound 1.5	*	*	*	*	*	*	*	*	*	*	*	*	*
AC40	tip01	24813.9	11279	0.456856	0.4649	0.029022	0.137945	27430.3	26737	1.83116	1.35496	0.04	0.04
AC40	tip02	37000.9	16018.7	3.01493	3.29489	1.0517	0.158054	26324.3	23901.2	1.91136	1.53811	2.17	1.94
AC40	tip03	39031.5	17034	1.254	1.35126	0.331021	0.062411	27968.4	25071.5	1.79043	1.50822	1.37	1.63
AC40	tip04	37000.9	16018.7	1.65691	1.785	0.465191	0.09279	27206.1	24447.2	1.82679	1.50175	2.31	2.88
AC40	tip05	38016.2	17034	0.46256	0.498255	0.131169	0.025273	27945.6	25236.8	1.85869	1.54487	0.85	1.03
AC40	tip06	49973.8	21997.5	0.276623	0.29312	0.068024	0.011366	34645.3	32033	2.12396	1.84545	4.51	4.86
AC40	tip07	58998.4	26002.2	0.087256	0.094213	0.028243	0.00429	41654.7	38227.3	2.0265	1.66308	37.47	38.81
AC40	tip08	49973.8	21997.5	0.275257	0.293043	0.077167	0.0131	35575.2	32918.1	2.14916	1.81054	3.65	4.15
AC40	tip09	47999.7	20982.2	0.356908	0.377228	0.085651	0.015693	34155.1	31538.3	2.12352	1.82626	2.58	3.06
AC40	tip10	54993.8	24028	0.215315	0.229797	0.065587	0.009404	38588.1	35951.1	2.25334	1.87329	3.87	3.86
AC40	tip11	46984.4	20982.2	0.142258	0.152158	0.041041	0.006708	33511	30934.8	2.10316	1.77675	16.92	16.55
AC40	tip12	49015	21997.5	0.364345	0.385868	0.088166	0.01537	34154.1	31606.4	2.12831	1.86218	2.49	2.75
AC40	tip13	42979.8	19008.1	0.402555	0.429543	0.114113	0.018947	30728.1	28350.4	2.10401	1.76902	2.51	3.02
AC40	tip14	27976.3	12972.9	0.128403	0.144733	0.08263	0.058633	20549.3	18708.3	1.92747	1.44688	19.36	19.88
AC40	tip15	32996.3	15003.4	0.317902	0.342547	0.086012	0.01809	24740.6	22172.5	1.78598	1.48434	2.08	2.34
AC40	tip16	34998.6	15990.5	0.45976	0.491998	0.095578	0.024054	25630.8	22843.8	1.72791	1.49751	1.68	2.07
AC40	tip17	34998.6	15003.4	0.745867	0.79875	0.193563	0.03987	25969.7	23359.2	1.84281	1.51934	1.4	1.69
AC40	tip18	34011.5	15003.4	0.646815	0.695663	0.177057	0.034082	25437.6	22857.9	1.82379	1.4997	1.06	1.16
AC40	tip19	31022.1	13988.2	0.361018	0.396904	0.117444	0.021021	22708.9	20132.3	1.68763	1.37928	2.46	2.55
AC40	tip20	31981	13988.2	0.380814	0.417791	0.124391	0.022251	23636.8	20961.1	1.70859	1.37242	1.45	1.56
AC40	tip21	24986.9	10998.8	0.509917	0.596068	0.239609	0.038774	19431.2	16315.8	1.40999	1.00692	2.62	2.87
AC40	tip22	36992.3	16000.5	0.162831	0.178471	0.06077	0.008643	26177.5	23930.2	1.9868	1.57205	35.77	35.95
AC40	tip23	34999.8	15004.2	1.46989	1.60169	0.472847	0.07943	25881.2	23141.9	1.78646	1.42633	4.46	5.21
AC40	tip24	36006.1	16000.5	0.469321	0.497012	0.071411	0.025481	27203.5	24159.9	1.72554	1.4767	5.77	6.57
AC40	tip25	35002.5	16001.7	0.431253	0.466188	0.123404	0.024558	26585.1	23803.3	1.78014	1.45937	2.92	3.19
Freq bound 3	*	*	*	*	*	*	*	*	*	*	*	*	*
AC40	tip01	50755.7	5639.52	0.460029	0.479348	0.079734	0.012349	28423.4	24900.5	1.82828	1.36233	0.24	1.39
AC40	tip02	74001.9	8009.35	3.13538	3.29079	0.600393	0.051573	26646.7	23717.3	1.90625	1.48756	5.82	4.1
AC40	tip03	77950.1	9024.62	1.27898	1.34747	0.223304	0.020127	28138.8	24740.8	1.80693	1.42719	0.88	1.67
AC40	tip04	74001.9	8009.35	1.69497	1.78093	0.291941	0.027874	27400.4	24098.4	1.82056	1.42431	2.46	5.44
AC40	tip05	75017.1	8009.35	0.476079	0.497655	0.055056	0.005068	28238.1	24868.5	1.82834	1.47556	1.51	4.26
AC40	tip06	98988.8	10998.8	0.28311	0.292453	0.039233	0.003369	34820.6	31830.5	2.1548	1.78331	5.74	6.24
AC40	tip07	117997	12972.9	0.089951	0.093322	0.021972	0.014021	41822.7	38137.9	2.13625	1.69227	21.87	20.47
AC40	tip08	100004	10998.8	0.282997	0.292488	0.039865	0.003372	35857.4	32699.2	2.12922	1.75069	6.47	7.6
AC40	tip09	95999.4	10998.8	0.366094	0.377551	0.037407	0.003057	34354.1	31365	2.14106	1.80499	3.35	3.77
AC40	tip10	109988	12014	0.222426	0.229447	0.035718	0.003119	38901.7	35792.6	2.23724	1.82741	10.52	8.22
AC40	tip11	94025.2	9983.49	0.146304	0.151723	0.025131	0.00215	33736.5	30739.6	2.12319	1.70867	18.06	17.29
AC40	tip12	97014.7	10998.8	0.372053	0.384418	0.048874	0.004191	34350.2	31350.9	2.1324	1.77245	2.53	3.59
AC40	tip13	85000.6	9024.62	0.414167	0.428448	0.053174	0.004468	31004.5	28100.8	2.06517	1.69639	4.01	6.73
AC40	tip14	56009	5978.81	0.144631	0.155159	0.029409	0.002878	21653.9	18232.6	1.58267	1.1746	5.98	7.51
AC40	tip15	67007.8	6994.08	0.325335	0.34183	0.045832	0.003952	24955.2	21773.5	1.7685	1.39768	3.45	7.61
AC40	tip16	69997.2	8009.35	0.466553	0.491079	0.064847	0.004715	25718.5	22452.3	1.76295	1.41055	1.45	3.39
AC40	tip17	69997.2	8009.35	0.757249	0.79598	0.137311	0.00768	26134.6	23060.4	1.83539	1.43495	1.93	3.25
AC40	tip18	67994.9	8009.35	0.661206	0.694853	0.099043	0.006435	25660.1	22529.8	1.79857	1.43523	1.64	2.77
AC40	tip19	61987.8	6994.08	0.37137	0.395618	0.059481	0.004974	23128.2	19758.1	1.63679	1.2771	1.49	2.61
AC40	tip20	64018.4	6994.08	0.393544	0.417507	0.052397	0.005006	24030.1	20544.7	1.64715	1.29786	3.21	8.97
AC40	tip21	49015	5019.94	0.540151	0.59793	0.117991	0.010027	20130.1	15796.2	1.34843	0.94647	0.83	1.58
AC40	tip22	74004.8	7990.18	0.168569	0.176083	0.044502	0.028689	26410.5	23800.9	2.0156	1.56682	8.44	6.5
AC40	tip23	69999.6	8000.24	1.51123	1.59827	0.27205	0.018275	26189.4	22772.9	1.73964	1.35016	4.39	7.68
AC40	tip24	71992.1	7990.18	0.473276	0.497131	0.061836	0.004606	27225.4	23804.7	1.77975	1.42431	1.5	3.02
AC40	tip25	71001.3	8000.86	0.4415	0.465428	0.070263	0.006246	26837.2	23380.2	1.75396	1.37911	3.57	6.64
*	*	*	*	*	*	*	*	*	*	*	*	*	*
AC10	tip01	1267764	316941	0.032416	0.039742	0.017418	0.00203	774367	586675	1.19461	0.709178	2.78	4.56
AC10	tip02	1010602	252651	0.042597	0.051275	0.021525	0.002713	645965	499533	1.24752	0.76364	0.53	0.82
AC10	tip03	1107602	277464	0.034153	0.040886	0.020062	0.010981	639912	500959	1.25947	0.79008	1.44	2.02
AC10	tip04	1060230	265058	0.036516	0.044667	0.021436	0.007818	643053	498395	1.24036	0.740847	1.59	2.03
AC10	tip05	1080532	269569	0.026367	0.031854	0.018746	0.013345	624177	480326	1.21825	0.755017	1.54	1.94
AC10	tip06	1148207	286488	0.041172	0.048923	0.020439	0.002222	672850	536391	1.31384	0.824006	1.03	1.62
AC10	tip07	1001579	250395	0.048749	0.057451	0.022508	0.002781	609381	483850	1.30604	0.844879	0.64	0.86
AC10	tip08	1001579	250395	0.041894	0.049422	0.020098	0.002357	601913	483090	1.33653	0.854533	3.72	5.22
AC10	tip09	764719	190616	0.030582	0.037178	0.020924	0.011844	474054	379439	1.32857	0.788458	1.78	1.98
AC10	tip10	1035416	259418	0.034087	0.040772	0.01947	0.009257	609800	482695	1.2916	0.805724	1.06	1.44
AC10	tip11	1019626	254906	0.029949	0.03693	0.018552	0.00662	632905	492818	1.25787	0.728761	0.75	1.01
AC10	tip12	1112114	277464	0.022204	0.025143	0.020286	0.018174	625517	529841	1.52854	1.06153	1.46	1.42
AC10	tip13	1015114	253778	0.032049	0.037876	0.0269	0.021803	604716	492731	1.37448	0.882109	1.99	1.67
AC10	tip14	805324	200767	0.051605	0.061618	0.025408	0.002929	487209	384334	1.28332	0.811808	0.82	0.94
AC10	tip15	868655	217365	0.042942	0.053141	0.029133	0.013234	551864	436183	1.3004	0.740336	1.69	2.14
AC10	tip16	729380	181943	0.063778	0.079188	0.040238	0.012246	461136	360236	1.26789	0.722411	1.78	2.26
AC10	tip17	793785	198044	0.068659	0.082993	0.042264	0.022768	472772	370166	1.26022	0.77655	1.16	1.34
AC10	tip18	769633	191603	0.080838	0.100158	0.052791	0.024988	474700	364818	1.22237	0.710783	2.42	2.88
AC10	tip19	792980	198044	0.089706	0.105217	0.063777	0.046771	470917	388032	1.41511	0.915162	4.28	3.58
AC10	tip20	607012	152156	0.044395	0.052866	0.031258	0.023457	346560	272477	1.25828	0.823049	1.7	1.52
No 1 over f	*	*	*	*	*	*	*	*	*	*	*	*	*
AC10	tip01	1267764	316941	0.03268	0.040384	0.01759	0.002087	778629	577548	1.15305	0.678075	2.81	4.69
AC10	tip02	1010602	252651	0.042881	0.051906	0.021631	0.002773	648915	493695	1.21064	0.735819	0.53	0.87
AC10	tip03	1107602	277464	0.034432	0.041663	0.020366	0.010606	642264	494048	1.21766	0.750163	1.46	2.14
AC10	tip04	1060230	265058	0.036792	0.04551	0.021663	0.006492	645629	491835	1.20184	0.703928	1.56	2.11
AC10	tip05	1080532	269569	0.026676	0.032718	0.019023	0.013108	627533	470423	1.1633	0.70304	1.53	1.98
AC10	tip06	1148207	286488	0.041375	0.049419	0.02069	0.002273	674410	531969	1.28463	0.80033	1.04	1.7
AC10	tip07	1001579	250395	0.048962	0.057957	0.022744	0.002832	610715	480405	1.28057	0.823398	0.64	0.9
AC10	tip08	1001579	250395	0.042119	0.049959	0.02037	0.002414	603412	478885	1.30392	0.827571	3.61	5.46
AC10	tip09	764719	190616	0.030891	0.038227	0.021085	0.010476	476883	373217	1.26827	0.72888	1.7	2.09
AC10	tip10	1035416	259418	0.034366	0.041568	0.019768	0.008636	612063	476160	1.24712	0.763225	1.05	1.52
AC10	tip11	1019626	254906	0.030285	0.038068	0.018739	0.003682	637296	482931	1.1972	0.670516	0.77	1.1
AC10	tip12	1112114	277464	0.022412	0.025637	0.020495	0.018196	626965	523231	1.46323	0.998479	1.42	1.49
AC10	tip13	1015114	253778	0.032304	0.03855	0.027108	0.021643	606469	487093	1.32877	0.838818	1.87	1.68
AC10	tip14	805324	200767	0.051851	0.062194	0.025665	0.002987	488363	381380	1.25738	0.790565	0.8	0.99
AC10	tip15	868655	217365	0.043159	0.05393	0.029218	0.011749	553613	432452	1.26995	0.710906	1.69	2.22
AC10	tip16	729380	181943	0.064082	0.080266	0.040373	0.008865	462517	357258	1.24091	0.696108	1.77	2.33
AC10	tip17	793785	198044	0.068903	0.083691	0.04249	0.022266	473552	368014	1.24193	0.758766	1.15	1.38
AC10	tip18	769633	191603	0.081165	0.101206	0.052987	0.023648	475824	362207	1.20173	0.690916	2.39	2.93
AC10	tip19	792980	198044	0.09415	0.117864	0.067287	0.040364	481710	359011	1.15428	0.667172	3.69	4.4
AC10	tip20	607012	152156	0.044719	0.053652	0.03159	0.02342	347378	269606	1.22607	0.792151	1.63	1.53
Freq bound 1.5	*	*	*	*	*	*	*	*	*	*	*	*	*
AC10	tip01	950823	422964	0.033143	0.039806	0.016335	0.002812	774086	614664	1.23313	0.830904	1.71	1.98
AC10	tip02	757952	337243	0.045994	0.051147	0.003852	0.003852	673355	513463	1.15725	0.801192	0.77	0.9
AC10	tip03	831266	368825	0.034573	0.042314	0.019173	0.002862	642592	517279	1.25838	0.845329	0.95	1.08
AC10	tip04	795173	353034	0.036829	0.045288	0.020303	0.003174	649001	511016	1.21114	0.789051	1.87	2.04
AC10	tip05	809835	359802	0.027497	0.034442	0.015901	0.002487	642852	495159	1.15451	0.742762	1.56	1.73
AC10	tip06	860591	383488	0.041085	0.049056	0.021068	0.003323	669542	552593	1.34079	0.929234	1.39	1.63
AC10	tip07	751184	333860	0.049058	0.057351	0.02072	0.004056	614357	492841	1.26363	0.880996	1.7	1.96
AC10	tip08	751184	333860	0.042517	0.049432	0.017627	0.003439	608659	493076	1.29039	0.913601	1.16	1.34
AC10	tip09	574103	254906	0.027853	0.036654	0.025924	0.013819	449365	386991	1.52374	0.887934	1.45	1.5
AC10	tip10	777126	345139	0.034663	0.041771	0.017524	0.002926	618450	493777	1.24286	0.844369	0.83	0.97
AC10	tip11	764719	339499	0.030584	0.037469	0.016716	0.002846	642896	505033	1.21401	0.772724	0.73	0.83
AC10	tip12	833521	371080	0.021786	0.027439	0.02054	0.01432	625735	533693	1.462	0.925755	1.68	1.76
AC10	tip13	761335	338371	0.02977	0.038858	0.02998	0.019945	585605	494896	1.42372	0.855932	1.03	1.03
AC10	tip14	604557	268441	0.049341	0.061557	0.030937	0.004408	475926	391037	1.3256	0.85489	1.12	1.19
AC10	tip15	652095	289820	0.040901	0.054688	0.03295	0.004392	539945	446924	1.36669	0.771062	0.67	0.7
AC10	tip16	546633	243127	0.060555	0.080023	0.04668	0.006243	449866	369057	1.33241	0.769882	0.73	0.77
AC10	tip17	594936	264863	0.067834	0.085943	0.043876	0.006249	469801	378278	1.25959	0.800171	1.26	1.29
AC10	tip18	577225	256813	0.081699	0.103083	0.050082	0.007709	478940	372717	1.18612	0.737165	1.23	1.31
AC10	tip19	594936	264058	0.085421	0.114309	0.070131	0.012502	461880	389039	1.41459	0.814345	1.07	1.11
AC10	tip20	454856	202069	0.044198	0.057571	0.030579	0.003952	349924	274785	1.18505	0.731672	0.43	0.42
Freq bound 3	*	*	*	*	*	*	*	*	*	*	*	*	*
AC10	tip01	1901647	210918	0.032547	0.038406	0.016254	0.010124	787037	563721	1.15517	0.670734	0.72	1.62
AC10	tip02	1515903	168058	0.042843	0.049855	0.020317	0.011512	652676	484965	1.2252	0.723524	1.07	2.38
AC10	tip03	1661403	184976	0.034572	0.040069	0.018175	0.013363	655071	486562	1.21017	0.745669	0.54	0.84
AC10	tip04	1590345	177081	0.03697	0.043168	0.019528	0.013698	657078	483928	1.19807	0.721722	0.64	1.02
AC10	tip05	1620799	180465	0.026704	0.031478	0.017177	0.013962	645438	464319	1.1509	0.688378	1.26	1.63
AC10	tip06	1722310	190616	0.0416	0.047465	0.018475	0.011657	683487	522903	1.27745	0.802142	0.78	1.56
AC10	tip07	1502369	166930	0.049332	0.056281	0.0205	0.011044	615984	474158	1.2935	0.813816	14.7	25.5
AC10	tip08	1502369	166930	0.042366	0.048067	0.018343	0.011239	609141	472944	1.31438	0.834847	1.08	2.04
AC10	tip09	1147079	127453	0.031415	0.03614	0.018718	0.014632	487650	373504	1.27895	0.790195	0.4	0.44
AC10	tip10	1553124	172569	0.034578	0.039653	0.017826	0.013097	620599	472087	1.26233	0.791217	0.9	1.29
AC10	tip11	1529438	170314	0.030296	0.035214	0.017307	0.012872	644214	479872	1.22418	0.733786	0.83	1.36
AC10	tip12	1668171	184976	0.022714	0.024705	0.019861	0.018869	628673	529322	1.58057	1.12097	6.23	4.62
AC10	tip13	1522671	169186	0.032982	0.037004	0.02571	0.023418	612795	491367	1.3973	0.933312	2.8	1.73
AC10	tip14	1207986	134221	0.052597	0.060323	0.02242	0.01262	494601	378356	1.27455	0.803943	0.76	0.88
AC10	tip15	1304190	144910	0.04363	0.050246	0.027378	0.021821	560833	427015	1.2732	0.772431	0.73	1.09
AC10	tip16	1094071	122368	0.064954	0.075104	0.037441	0.028194	468220	354275	1.25625	0.76387	1.78	2.27
AC10	tip17	1190677	132029	0.069875	0.081115	0.038107	0.028383	484467	361362	1.21853	0.75113	0.93	1.21
AC10	tip18	1153645	128004	0.082439	0.097011	0.047652	0.035082	487765	356011	1.18142	0.701381	1.57	1.98
AC10	tip19	1189067	132029	0.094243	0.106049	0.055167	0.045145	486036	391269	1.40677	0.929891	1.58	0.66
AC10	tip20	911323	100632	0.045406	0.052127	0.02923	0.025042	353031	269123	1.25707	0.816538	1.07	0.77
