# Supplementary material
Source: Frontiers journal article supplement (https://www.frontiersin.org/articles/551246)
Supplement: Table_2.xlsx [file Table_2.xlsx]

## Sheet: Air
The calculated parameters for each individual cantilevers in Air
CantName	FileName	Freq_upperbound	Freq_lowerbound	A1	Awhite	Res_Freq	Q
AC40	tip01	147756	73313.8	1.09492	0.028332	112240	39.1206
AC40	tip02	132888	66782.2	2.19638	0.054517	99811.4	43.4144
AC40	tip03	132549	66443.8	1.64828	0.037644	99493.2	43.6138
AC40	tip04	131985	65879.7	2.60636	0.03941	99015.8	42.7916		ß
AC40	tip05	135820	67910.3	0.885153	0.032263	101830	44.8113
AC40	tip06	168422	84380.2	0.154718	0.016501	126404	39.2936
AC40	tip07	204859	102881	0.091175	0.01607	153844	31.9151
AC40	tip08	171806	85846.7	0.161383	0.015733	128852	37.0621
AC40	tip09	167689	83646.9	0.155922	0.015732	125675	37.4103
AC40	tip10	179139	89118.1	0.112158	0.016371	134124	35.1337
AC40	tip11	161090	81108.8	0.192469	0.016424	121102	47.2154
AC40	tip12	161428	81447.2	0.647226	0.033297	121430	49.8687
AC40	tip13	153418	77386.1	0.579189	0.035371	115410	40.126
AC40	tip14	119181	59167.7	0.688338	0.024616	89215.3	39.8162
AC40	tip15	124314	62326.3	1.02239	0.02498	93356	41.1696
AC40	tip16	131224	65231.1	0.970436	0.031168	98228.7	42.0433
AC40	tip17	130660	64667	0.82437	0.029684	97712.4	40.1384
AC40	tip18	124794	62805.7	0.916451	0.028052	93809.8	41.2438
AC40	tip19	120422	60408.5	1.1372	0.029805	90413.2	40.125
AC40	tip20	128037	64018.4	1.02893	0.030399	96049.1	41.4448
AC40	tip21	131844	65851.5	0.95576	0.024403	98922	39.5137
AC40	tip22	122942	62034.7	0.194091	0.013955	99156.8	36.1501
AC40	tip23	136437	68449.9	3.87325	0.1629	102497	41.3971
AC40	tip24	141348	71348.1	0.873972	0.012164	106497	30.4643
AC40	tip25	136799	68812.1	1.06334	0.02914	103026	40.6367
*	*	*	*	*	*	*	*
AC10	tip01	1964809	983533	0.117735	0.028316	1.47484e+06	54.1966
AC10	tip02	2135123	1068125	0.10832	0.029473	1.60153e+06	44.6748
AC10	tip03	2068577	1035416	0.114193	0.028194	1.55248e+06	43.3035
AC10	tip04	1955786	976765	0.139052	0.028733	1.46706e+06	55.6117
AC10	tip05	1941123	971126	0.158952	0.030239	1.45758e+06	52.1468
AC10	tip06	2115949	1057974	0.140041	0.031015	1.58732e+06	45.6937
AC10	tip07	1982856	990300	0.147892	0.032293	1.48705e+06	34.5132
AC10	tip08	1980600	990300	0.073073	0.017191	1.48591e+06	45.32
AC10	tip09	1673810	836905	0.086495	0.023265	1.25497e+06	42.1702
AC10	tip10	1864426	932777	0.035544	0.012536	1.39847e+06	51.5463
AC10	tip11	1935484	967742	0.125262	0.02878	1.45281e+06	56.4647
AC10	tip12	1938868	968870	0.091664	0.019548	1.45418e+06	55.0968
AC10	tip13	2080984	1041056	0.102897	0.025296	1.56323e+06	42.8275
AC10	tip14	1758403	878638	0.149816	0.025933	1.31846e+06	46.2043
AC10	tip15	1980196	991185	0.64359	0.491918	1.48573e+06	50.4739
AC10	tip16	1736807	868957	0.143836	0.034712	1.30278e+06	45.6177
AC10	tip17	1703599	851246	0.153851	0.037922	1.27823e+06	45.7317
AC10	tip18	1715775	856781	0.140085	0.035083	1.28656e+06	46.4546
AC10	tip19	1747877	873385	0.152062	0.036547	1.31164e+06	47.3165
AC10	tip20	1715775	856781	0.131423	0.034332	1.28644e+06	46.6474
